# Supplementary material for: Ocular Inflammation Induced by Immune Checkpoint Inhibitors
Source: MDPI journal article supplement (doi:10.3390/jcm11174993), 2022-08-25
Supplement: s1 [file s1]

Article

# Ocular Inflammation Induced by Immune Checkpoint Inhibitors

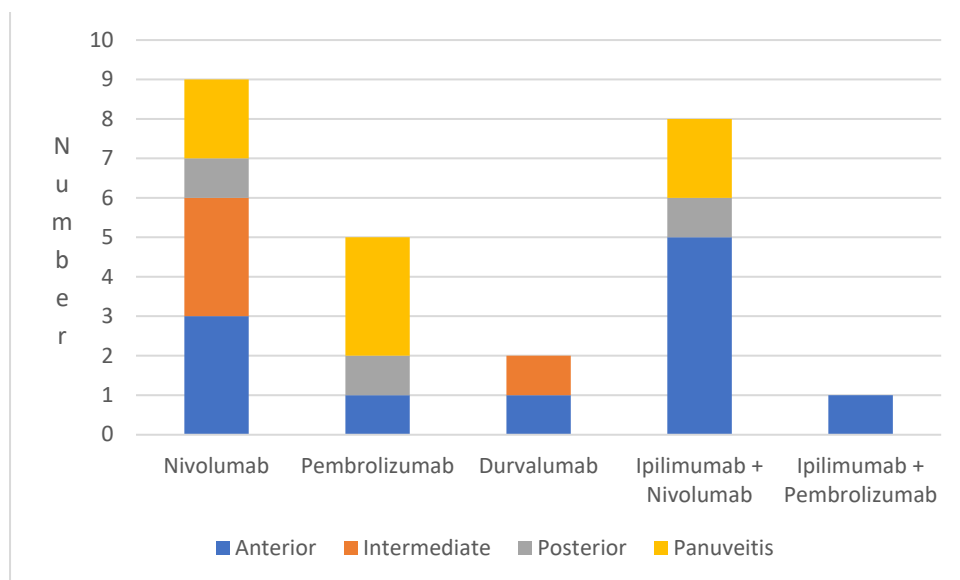

**Figure S1.** Distribution of uveitis depending on the ICPI

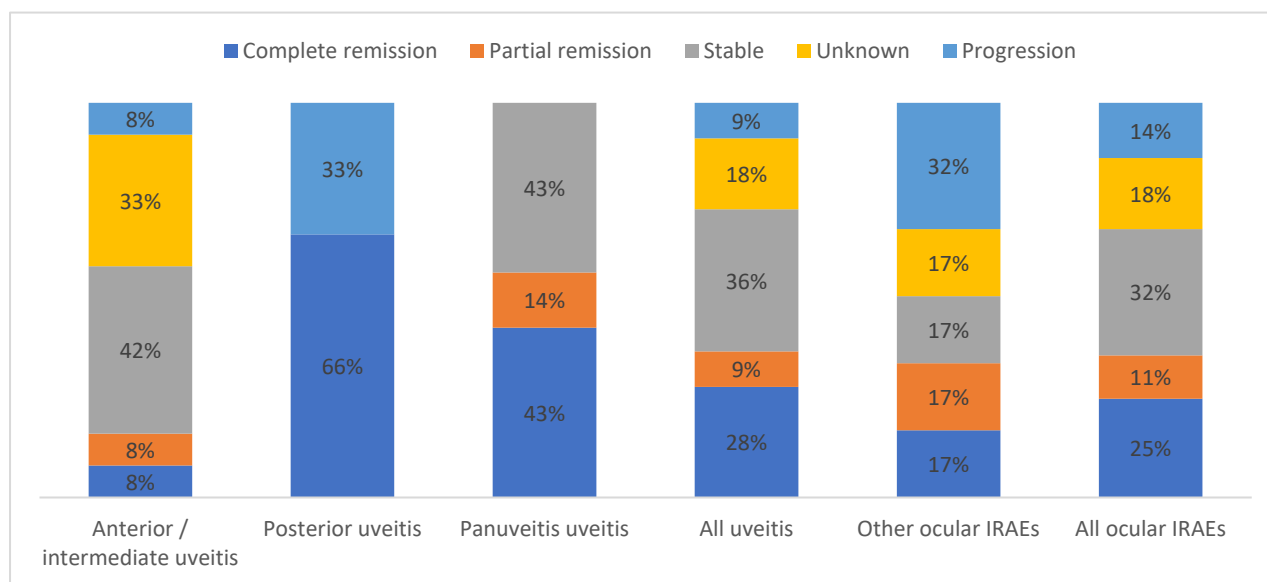

**Figure S2.** Neoplastic outcome depending on the type of ocular IRAEs at the end of the follow-up.

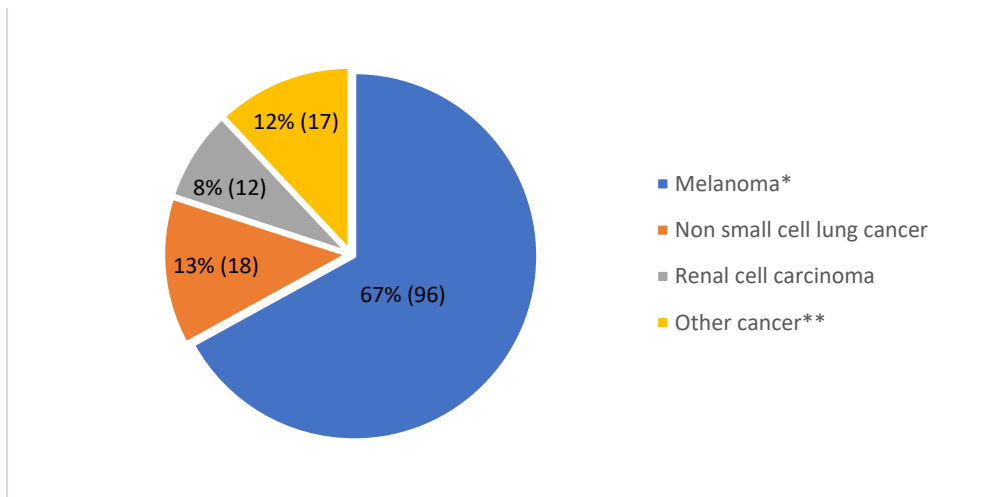

**Figure S3.** ICPI indications

\* 96 patients with melanoma (of whom 7 with uveal melanoma) ;

\*\* Small cell lung cancer (n=2 patients), lymphoma (n=2), prostate carcinoma (n=2), eosophageal carcinoma (n=2), ovarian carcinoma (n=2), endometrial cancer (n=1), colon adenocarcinoma (n=1), hypopharyngeal carcinoma (n=1), hypopharyngeal carcinoma (n=1), duct carcinoma (n=1), cutaneous squamous cell carcinoma (n=1), mesothelioma (n=1), unknown primary neoplasm (n=1).

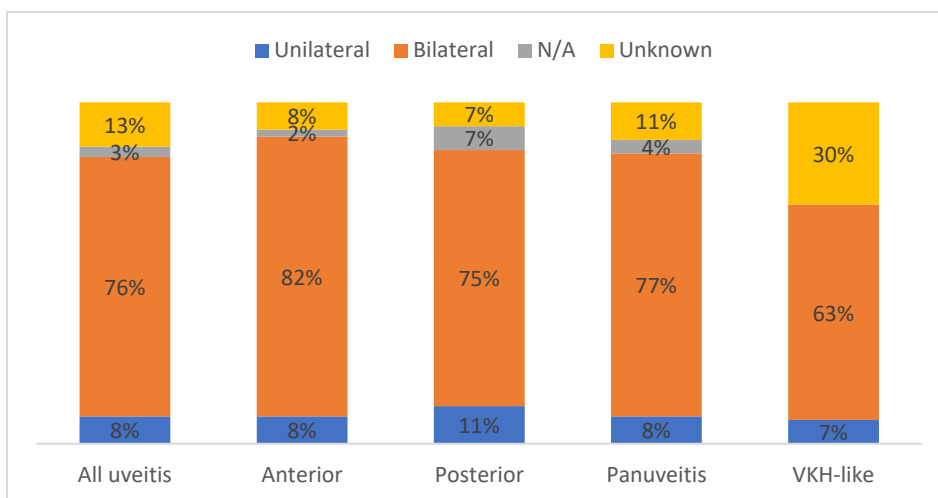

**Figure S4.** Unilateral or bilateral nature of the uveitis, depending on the type of uveitis.

N/A= not applicable, patients with a history of previous enucleation.

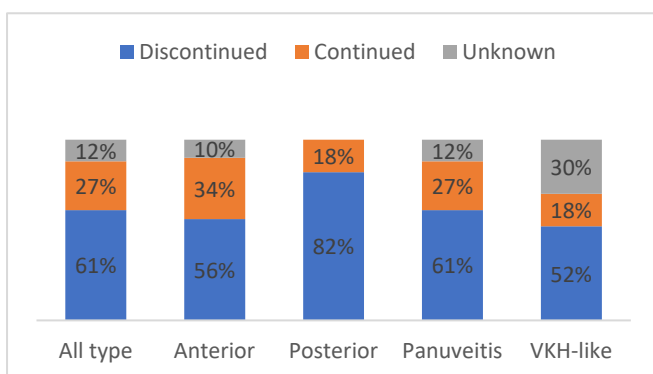

(a)

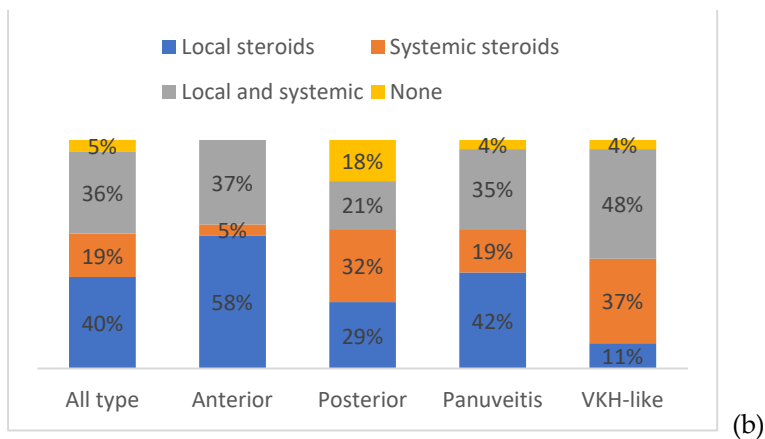

**Figure S5.** Discontinuation of ICPI (a) and treatment (b) depending on the type of uveitis.

**Table S1.** Repartition of uveitis depending on ICPI-

| ICPI                       | All type,<br>n (%) | Anterior,<br>n (%) | Posterior,<br>n (%) | Panuveitis,<br>n (%) | VKH-like, n<br>(%) |
|----------------------------|--------------------|--------------------|---------------------|----------------------|--------------------|
| Atezolizumab               | 4 (2.7)            | 1 (1.6)            | 2 (7.1)             | -                    | 1 (3.7)            |
| Cemiplimab                 | 1 (0.6)            | -                  | 1 (3.5)             | -                    | -                  |
| Durvalumab                 | 3 (2.0)            | 2 (3.2)            | 1 (3.5)             | -                    | -                  |
| Ipilimumab                 | 28 (19.5)          | 16 (25.8)          | 5 (17.8)            | 2 (7.6)              | 5 (18.5)           |
| Ipilimumab + Nivolumab     | 26 (18.8)          | 15 (24.1)          | 3 (10.7)            | 5 (19.2)             | 3 (11)             |
| Ipilimumab + Pembrolizumab | 2 (1.3)            | 1 (1.6)            | 1 (3.5)             | -                    | -                  |
| Nivolumab                  | 41 (28.6)          | 19 (30.6)          | 6 (21.4)            | 6 (23)               | 10 (37)            |
| Pembrolizumab              | 38 (26.5)          | 8 (12.9)           | 9 (32.1)            | 13 (50)              | 8 (29.6)           |
